# Supplementary material for: Evidence of solute PEDOT:PSS as an efficient passivation material for fabrication of hybrid c-Si solar cells
Source: Royal Society of Chemistry journal article supplement (doi:10.1039/c9se00093c), 2019-01-01

**Figure S1:** Scheme of structure of PEDOT:PSS hybrid c-Si solar cells.

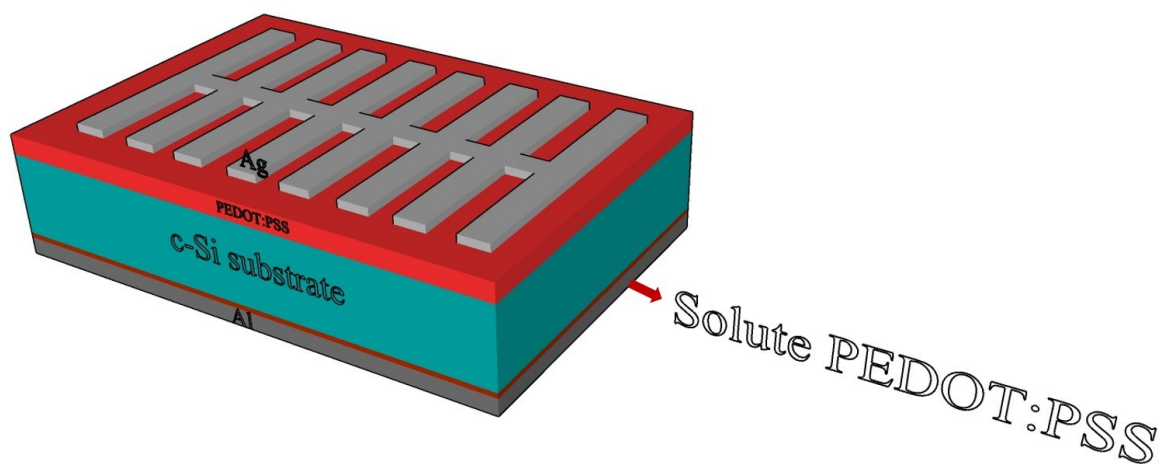

Figure S2: Transmittance of different solute PEDOT:PSS on glass.

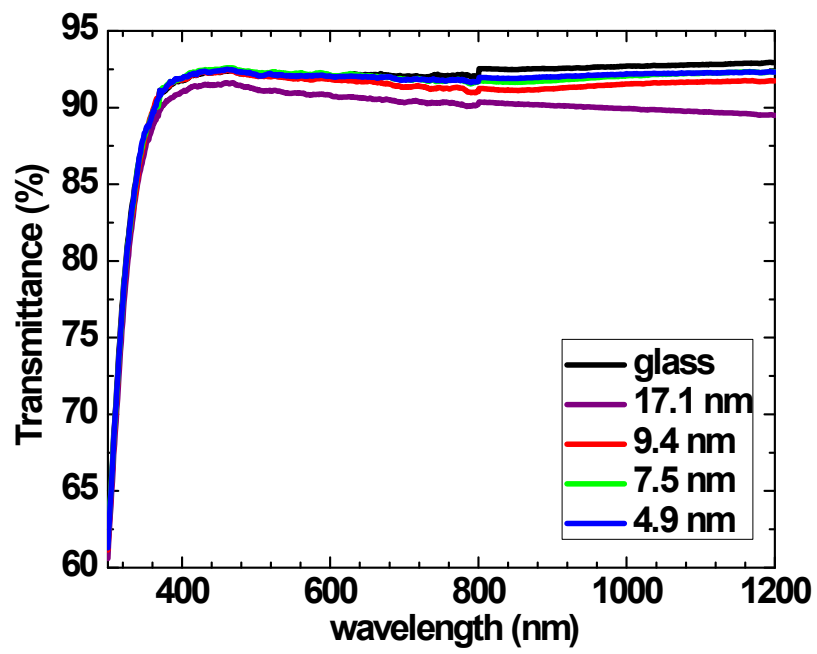

**Figure S3:** Effective carrier lifetimes under different injection levels of c-Si substrates passivated by solute PEDOT:PSS with thickness of 17.1, 9.4, 7.5 and 4.9 nm.

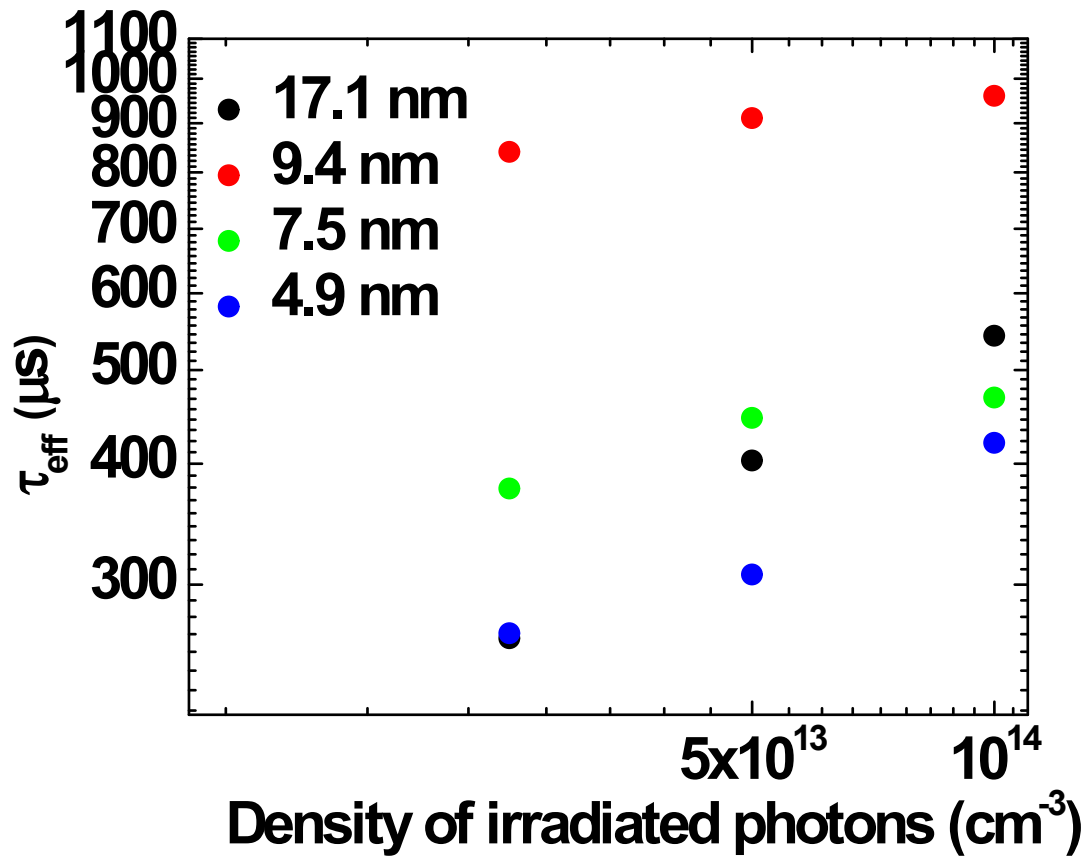

Figure S4: *J-V characteristics of solar cells as Ag/solute PEDOT:PSS/c-Si/Al*

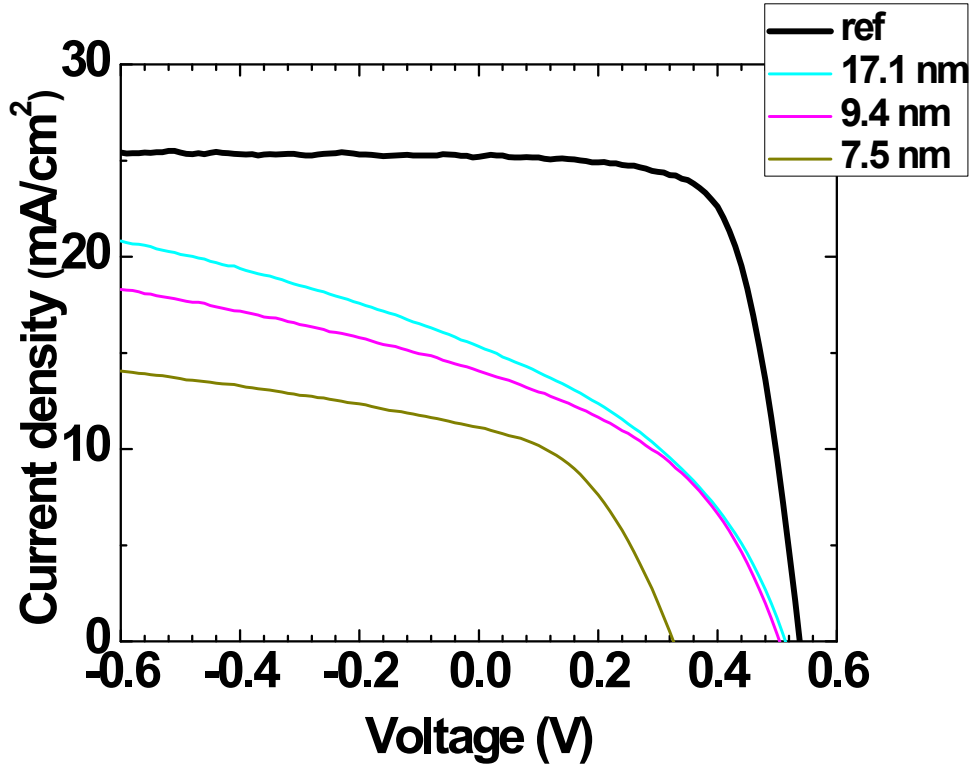

Table S1: *Key parameters extracted from thin PEDOT:PSS/ c-Si solar cells*

|                | $J_{sc}$<br>(mA/cm <sup>2</sup> ) | $V_{oc}$<br>(V) | FF    | $Eff$ (%) |
|----------------|-----------------------------------|-----------------|-------|-----------|
| <b>Ref</b>     | 25.97                             | 0.550           | 0.656 | 9.37      |
| <b>17.1 nm</b> | 16.02                             | 0.518           | 0.407 | 3.38      |
| <b>9.4 nm</b>  | 15.34                             | 0.514           | 0.388 | 3.06      |
| <b>7.5 nm</b>  | 11.12                             | 0.326           | 0.418 | 1.52      |

**Figure S5:** a) Band diagram of PEDOT/c-Si/solute PEDOT:PSS; Dark J-V for evaluation of  $R_S$  from hybrid c-Si with solute PEDOT:PSS at the backside.

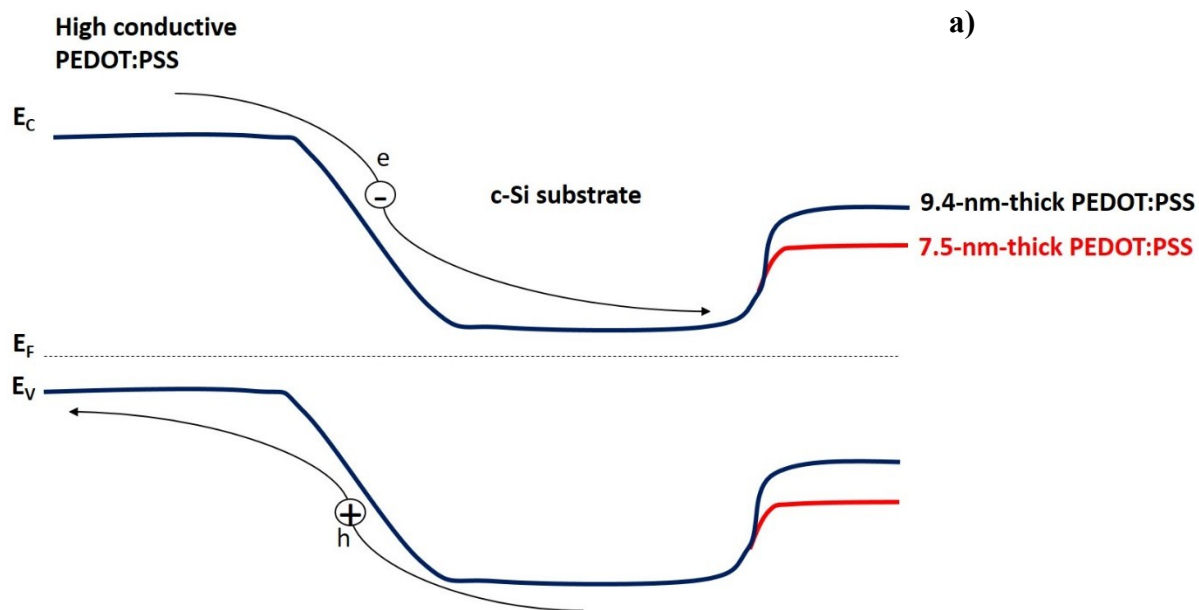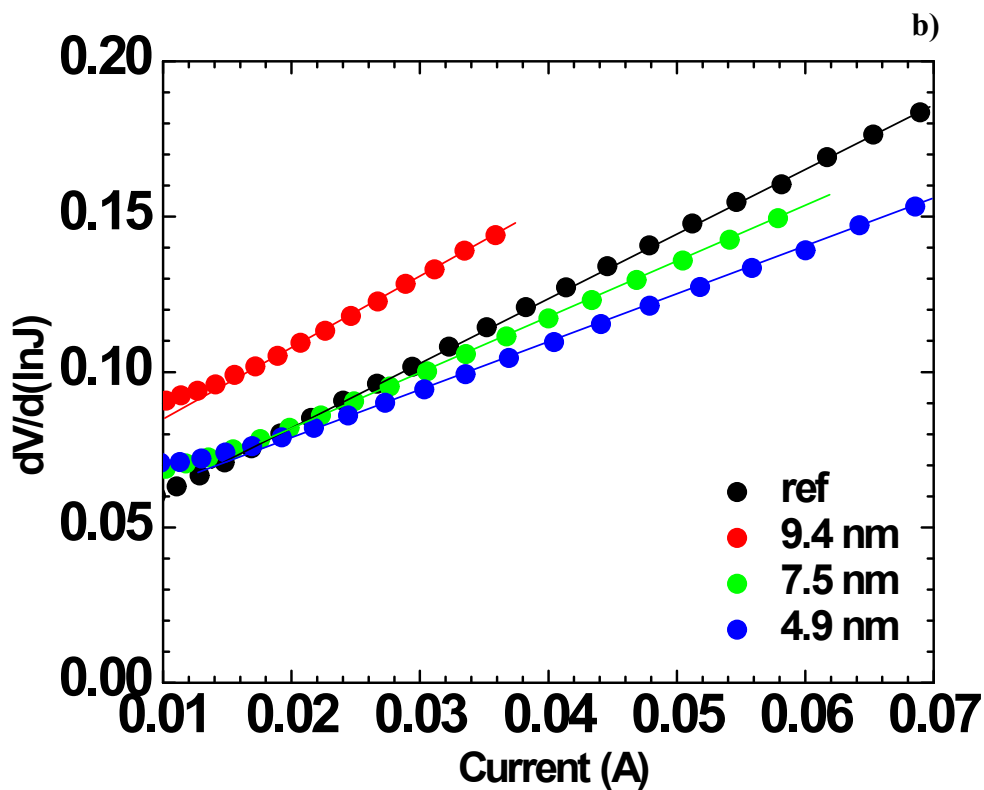

Supplement: c9se00093c1.pdf [file c9se00093c1.pdf]
